# Supplementary material for: Comparing short- and long-term effects of mandibular advancement with versus without maxillary setback on the oropharyngeal airway in skeletal Class II individuals: An extensive 2-year follow-up study
Source: Research Square preprint supplement (doi:10.21203/rs.3.rs-6932425/v1), 2025-07-30
Supplement: Supplementary file 1 [file e72061ba40410e8eb7b82f7c.docx]

Table S1. Evaluation of Changes in Hard and Soft Tissue

| Parameters (N=25) | T1-T0 | T2-T0 |
| --- | --- | --- |
| Hard tissue | | |
| A-FH (mm) | -0.76 | -0.60 |
| A-VFH (mm) | 2.55 | 2.20 |
| PNS-FH (mm) | 1.26 | 0.90 |
| PNS-VFH (mm) | 2.98 | 2.45 |
| B-FH (mm) | 1.95 | 1.76 |
| B-VFH (mm) | 6.20 | 5.66 |
| Me-FH (mm) | 2.38 | 2.54 |
| Me-VFH (mm) | 8.83 | 9.12 |
| NF-10 (mm) | 1.99 | 1.70 |
| Mandibular Body Length (mm) | 8.82 | 8.50 |
| Mandibular Width (mm) | 2.81 | 2.70 |
| Mandibular Body Depth (mm) | 9.31 | 9.25 |
| MP-FH (°) | -0.83 | 0.24 |
| H-FH (mm) | -2.46 | -1.28 |
| H-VFH (mm) | 3.72 | 2.78 |
| Soft tissue | | |
| Soft Palate Angle (°) | -2.24 | -0.14 |
| Soft Palate Length (mm) | -1.35 | -0.43 |
| Midline Area of Soft Palate (mm²) | -24.85 | -11.02 |

Table S2. Evaluation of Changes in Upper Airway

| Parameters (N=25) | T1-T0 | T2-T0 | T2-T1 |
| --- | --- | --- | --- |
| V (mm³) | 11639.76 (38.86%) | 6544.88 (21.85%) | -5094.88 (-12.24%) |
| CSAmin (mm²) | 133.20 (69.49%) | 82.64 (43.11%) | -50.56 (-15.56%) |
| VNA (mm³) | 2238.48 (22.31%) | 1390.00 (13.85%) | -848.48 (-6.91%) |
| VVE (mm³) | 5012.04 (46.05%) | 2147.16 (19.73%) | -2864.88 (-18.02%) |
| VGL (mm³) | 4412.56 (46.94%) | 2386.00 (25.38%) | -2026.56 (-14.67%) |

Table S3. Evaluation of Changes in Upper Airway Segments

| Parameters (N=25) | T1-T0 | T2-T0 | T2-T1 |
| --- | --- | --- | --- |
| A NA (mm²) | 83.81 (12.99%) | 47.82 (7.42%) | -35.99 (-4.93%) |
| TD NA (mm) | 2.86 (7.55%) | 2.12 (5.59%) | -0.74 (-1.81%) |
| SD NA (mm) | 2.46 (8.57%) | 1.43 (4.98%) | -1.03 (-3.30%) |
| A VE (mm²) | 207.80 (85.17%) | 117.14 (48.01%) | -90.65 (-20.06%) |
| TD VE (mm) | 8.58 (31.41%) | 5.64 (20.65%) | -2.94 (-8.18%) |
| SD VE (mm) | 7.76 (59.28%) | 4.27 (32.62%) | -3.48 (-16.69%) |
| A GL (mm²) | 101.28 (31.16%) | 55.05 (16.93%) | -46.23 (-10.84%) |
| TD GL (mm) | 4.61 (13.22%) | 2.71 (7.77%) | -1.90 (-4.81%) |
| SD GL (mm) | 5.87 (42.04%) | 3.49 (25.00%) | -2.38 (-11.99%) |

Table S4. Correlation between Short-term Changes in Upper Airway and Potential Influencing Factors

| Parameters | Pearson Correlation Coefficient | P-value |
| --- | --- | --- |
| A-FH | -0.166 | 0.427 |
| A-VFH | 0.327 | 0.110 |
| PNS-FH | -0.144 | 0.492 |
| PNS-VFH | 0.387 | 0.056 |
| B-FH | 0.071 | 0.737 |
| B-VFH | 0.485 | 0.014* |
| Me-FH | 0.114 | 0.588 |
| Me-VFH | 0.354 | 0.083 |
| H-FH | -0.425 | 0.034* |
| H-VFH | -0.053 | 0.803 |
| NF-10 | 0.092 | 0.661 |
| MP/FH | -0.025 | 0.905 |
| Mandibular body length | -0.031 | 0.884 |
| Mandibular width | -0.039 | 0.853 |
| Mandibular body depth | 0.074 | 0.725 |
| Uvular angle | -0.493 | 0.012* |
| Uvular length | 0.028 | 0.893 |
| Uvular midline area | -0.212 | 0.309 |
| PNS+B | 0.688 | <0.001* |
| V | -0.031 | 0.881 |
| CSAmin | -0.170 | 0.416 |

Table S5. Correlation between Short-term Changes in Glossopharyngeal Airway and Potential Influencing Factors

| Parameters | Spearman Correlation Coefficient | P-value |
| --- | --- | --- |
| B-FH | -0.057 | 0.785 |
| B-VFH | 0.179 | 0.393 |
| H-FH | -0.256 | 0.216 |
| H-VFH | -0.068 | 0.745 |
| MP/FH | 0.152 | 0.470 |
| Mandibular body length | 0.047 | 0.822 |
| Mandibular width | 0.138 | 0.512 |
| Mandibular body depth | 0.070 | 0.740 |
| PNS + B | 0.335 | 0.102 |
| Pre-treatment V GL | 0.040 | 0.849 |

Table S6. Correlation between Long-term Changes in Upper Airway and Potential Influencing Factors

| Parameters | Pearson Correlation Coefficient | P-value |
| --- | --- | --- |
| A-FH | -0.020 | 0.923 |
| A-VFH | 0.332 | 0.105 |
| PNS-FH | 0.026 | 0.900 |
| PNS-VFH | 0.214 | 0.305 |
| B-FH | 0.376 | 0.064 |
| B-VFH | 0.466 | 0.019* |
| Me-FH | 0.238 | 0.252 |
| Me-VFH | 0.410 | 0.042* |
| H-FH | 0.180 | 0.388 |
| H-VFH | 0.007 | 0.972 |
| NF-10 | 0.012 | 0.954 |
| MP/FH | 0.020 | 0.925 |
| Mandibular body length | 0.187 | 0.371 |
| Mandibular width | -0.124 | 0.555 |
| Mandibular body depth | 0.110 | 0.600 |
| Uvular angle | -0.192 | 0.359 |
| Uvular length | 0.072 | 0.732 |
| Uvular midline area | 0.074 | 0.726 |
| PNS + B | 0.596 | 0.002* |
| V | -0.217 | 0.298 |
| CSAmin | -0.413 | 0.040* |

Table S7. Correlation between Long-term Changes in Upper Airway Segments and Potential Influencing Factors

| Parameters | Spearman Correlation Coefficient | P-value |
| --- | --- | --- |
| Nasopharyngeal |  |  |
| A-FH | -0.030 | 0.885 |
| A-VFH | 0.433 | 0.031* |
| PNS-FH | 0.146 | 0.488 |
| PNS-VFH | 0.438 | 0.028* |
| NF-10 | 0.357 | 0.080 |
| PNS + B | -0.057 | 0.787 |
| Pre-treatment V NA | -0.024 | 0.910 |
| Velopharyngeal |  |  |
| B-FH | 0.272 | 0.189 |
| B-VFH | 0.504 | 0.010* |
| H-FH | 0.388 | 0.056 |
| H-VFH | 0.094 | 0.655 |
| MP/FH | -0.061 | 0.774 |
| Mandibular body length | 0.016 | 0.940 |
| Mandibular width | -0.087 | 0.679 |
| Mandibular body depth | -0.116 | 0.580 |
| Uvular angle | -0.570 | 0.003* |
| Uvular length | -0.220 | 0.290 |
| Uvular midline area | -0.112 | 0.596 |
| PNS + B | 0.477 | 0.016* |
| Pre-treatment V VE | -0.312 | 0.130 |
| Glossopharyngeal |  |  |
| B-FH | 0.102 | 0.628 |
| B-VFH | 0.334 | 0.103 |
| H-FH | -0.025 | 0.904 |
| H-VFH | -0.134 | 0.523 |
| MP/FH | 0.221 | 0.289 |
| Mandibular body length | 0.189 | 0.365 |
| Mandibular width | -0.132 | 0.528 |
| Mandibular body depth | -0.012 | 0.956 |
| PNS + B | 0.431 | 0.032* |
| Pre-treatment V GL | -0.304 | 0.140 |

Table S8. Baseline Characteristics of MAWMP and MAWMS Groups

| Parameters | MAWMP (N=25) | MAWMS (N=57) | P |
| --- | --- | --- | --- |
| Age (years) | 29.08 ± 4.10 | 27.37 ± 6.27 | 0.254 |
| BMI (kg/m²) | 22.35 ± 2.42 | 23.11 ± 2.15 | 0.159 |
| Gender |  |  | 0.068 |
| Male | 11 | 14 | 25 |
| Female | 14 | 43 | 57 |
| Total | 25 | 57 | 82 |
